# Supplementary material for: Size-tailored and acid-degradable polyvinyl alcohol microgels for inhalation therapy of bacterial pneumonia
Source: Royal Society of Chemistry journal article supplement (doi:10.1039/d4tb01224k), 2024-01-01
Supplement: d4tb01224k1.pdf [file d4tb01224k1.pdf]

## Supporting Information

### Size-Tailored and Acid-Degradable Polyvinyl Alcohol Microgels for Inhalation Therapy of Bacterial Pneumonia

Xiang Zhou <sup>a,1</sup>, Jingjing Zhou <sup>a,1</sup>, Lanlan Wang <sup>a</sup>, Bingbing Zhao <sup>a,\*</sup>, Yukun Ma <sup>a</sup>, Ni Zhang <sup>a</sup>, Wei Chen <sup>a,b,\*</sup>, Dechun Huang <sup>a,b,\*</sup>

<sup>a</sup> *Department of Pharmaceutical Engineering, School of Engineering, China Pharmaceutical University, Nanjing 210009, China*

<sup>b</sup> *Engineering Research Center for Smart Pharmaceutical Manufacturing Technologies, Ministry of Education, School of Engineering, China Pharmaceutical University, Nanjing 211198, China*

\* Corresponding authors

*E-mail address:*

[zhaobb@cpu.edu.cn](mailto:zhaobb@cpu.edu.cn) (BB. Zhao)

[w.chen@cpu.edu.cn](mailto:w.chen@cpu.edu.cn) (W. Chen)

[cpu hdc@cpu.edu.cn](mailto:cpu hdc@cpu.edu.cn) (DC. Huang)

<sup>1</sup> These authors contributed equally to this work

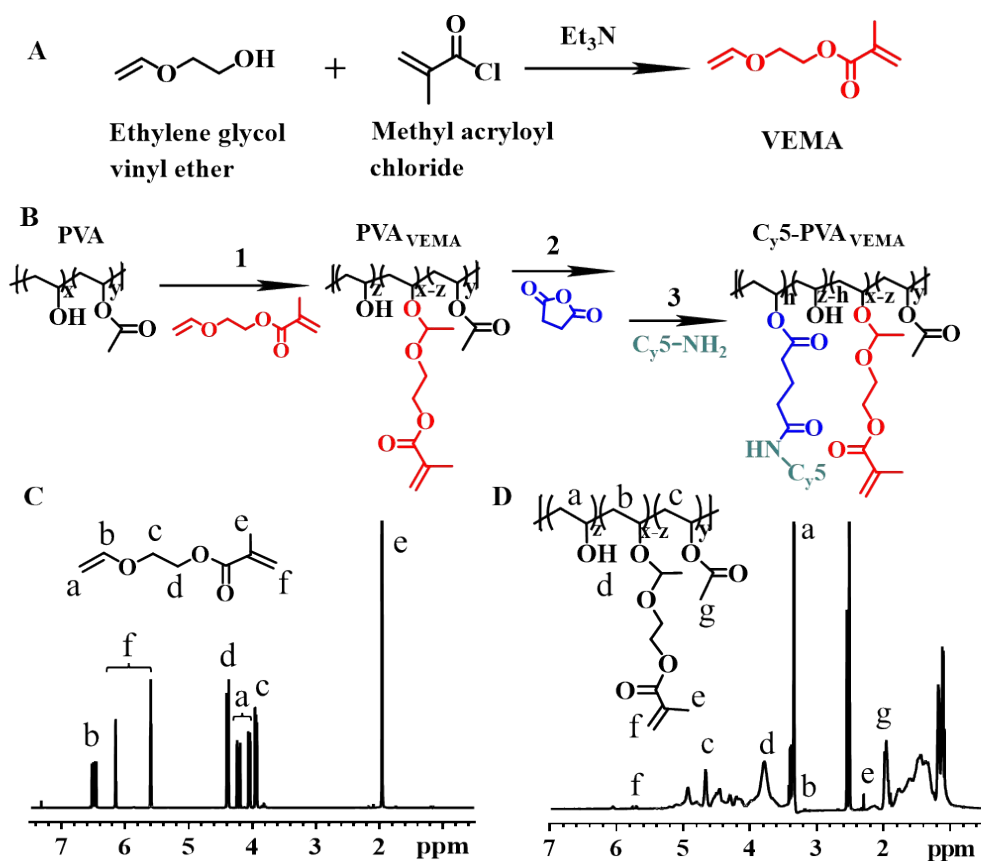

**Figure S1.** Preparation and characterization of VEMA, PVA<sub>VEMA</sub> and Cy5-PVA<sub>VEMA</sub>. (A) Synthesis steps of VEMA. (B) Synthesis steps of PVA<sub>VEMA</sub> and Cy5-PVA<sub>VEMA</sub>. (C) <sup>1</sup>H NMR spectra of VEMA (400 MHz, CDCl<sub>3</sub>). (D) <sup>1</sup>H NMR spectra of PVA<sub>VEMA</sub> (400 MHz, DMSO-*d*<sub>6</sub>).

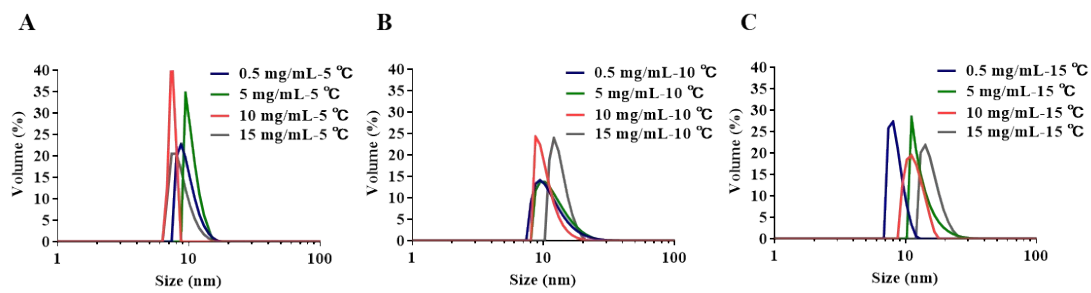

**Figure S2.** Size distribution of PVA<sub>VEMA</sub> dispersed in water at various concentrations and at 5 °C (A), 10 °C (B) and 15 °C (C).

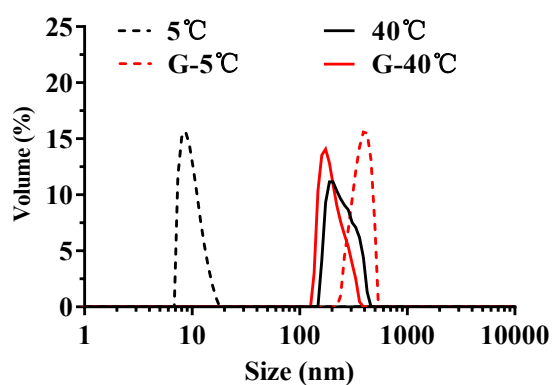

**Figure S3.** Particle size distribution of 0.5 mg/mL aqueous solution of PVA<sub>VEMA</sub> aggregation and PVA<sub>VEMA</sub> microgels (G) at 5 and 40°C. (Cross-linked: red dashed line, uncross-linked: black dashed line)

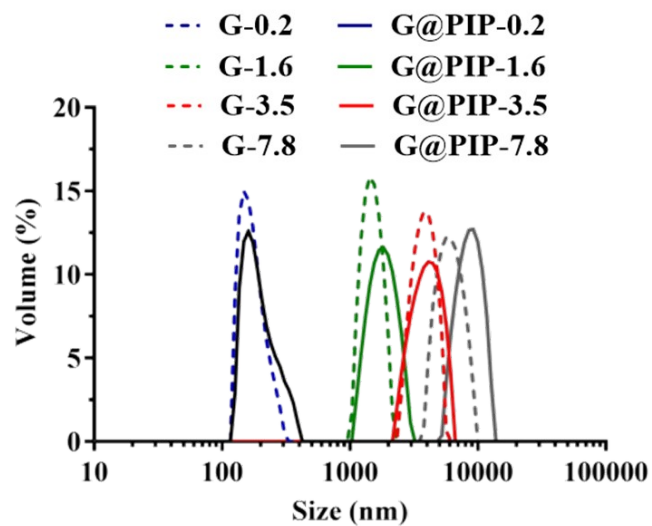

**Figure S4.** Size distribution of the PVA<sub>VEMA</sub> microgels before and after loading with PIP. (Before loading: red dashed line, After loading: solid line)

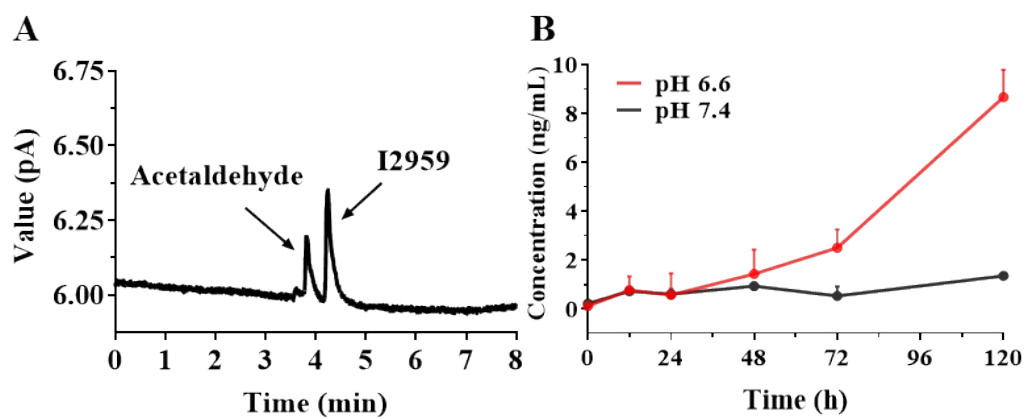

**Figure S5.** The pH degradation of PVA<sub>VEMA</sub> microgel. (A) Gas chromatographic detection of PVA<sub>VEMA</sub> microgel after complete degradation under acidic conditions. (B) Gas chromatographic detection of degradation of PVA<sub>VEMA</sub> microgel at pH 7.4 and 6.6 for 120 h.

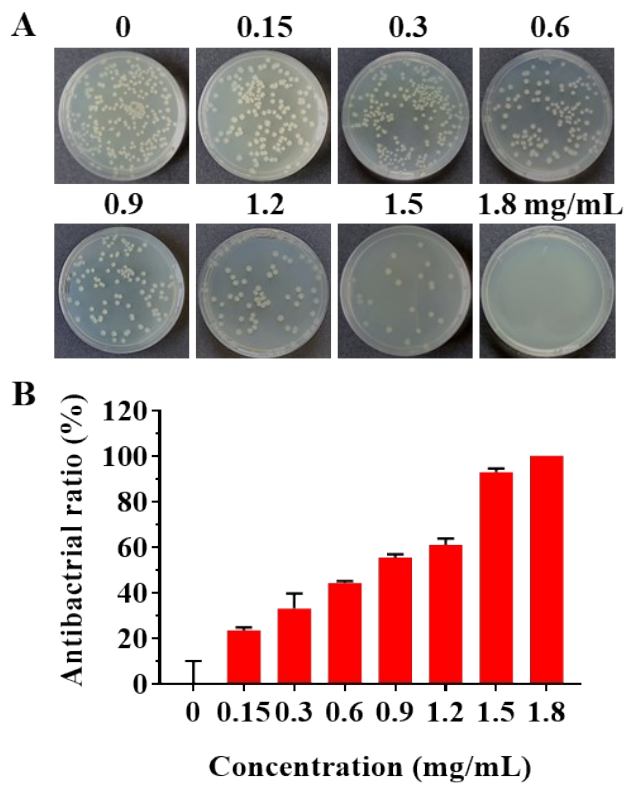

**Figure S6.** Antibacterial activity of the antibiotic drug PIP *in vitro*. (A) Coated plate method to evaluate the effect of different concentrations of PIP on *E. coli-lux* inhibition (A) and corresponding statistics (B). All data are presented as the mean  $\pm$  SD (n = 3).

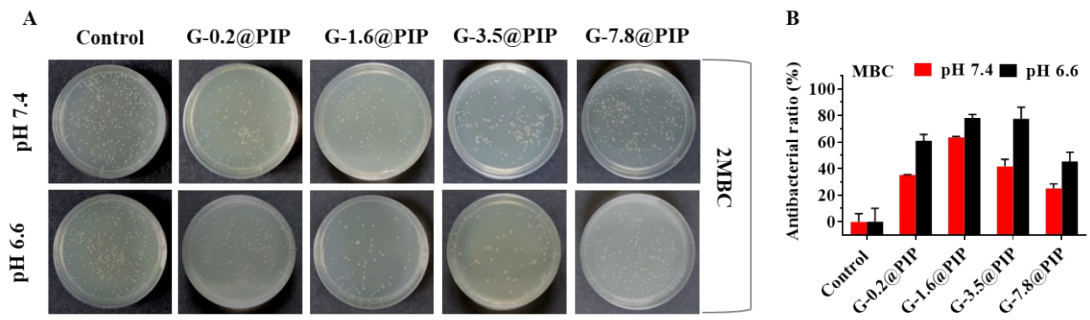

**Figure S7.** *In vitro* analysis of antibacterial properties. (A) Changes in colony growth of *E. coli-lux* with different groups (Control, G-0.2@PIP, G-1.6@PIP, G-3.5@PIP and G-7.8@PIP, PIP: 1.8 mg mL<sup>-1</sup>, MBC) incubated under pH 7.4 and pH 6.6 conditions. Survival statistics of the corresponding bacteria under conditions (B). All data are presented as the mean  $\pm$  SD (n = 3).



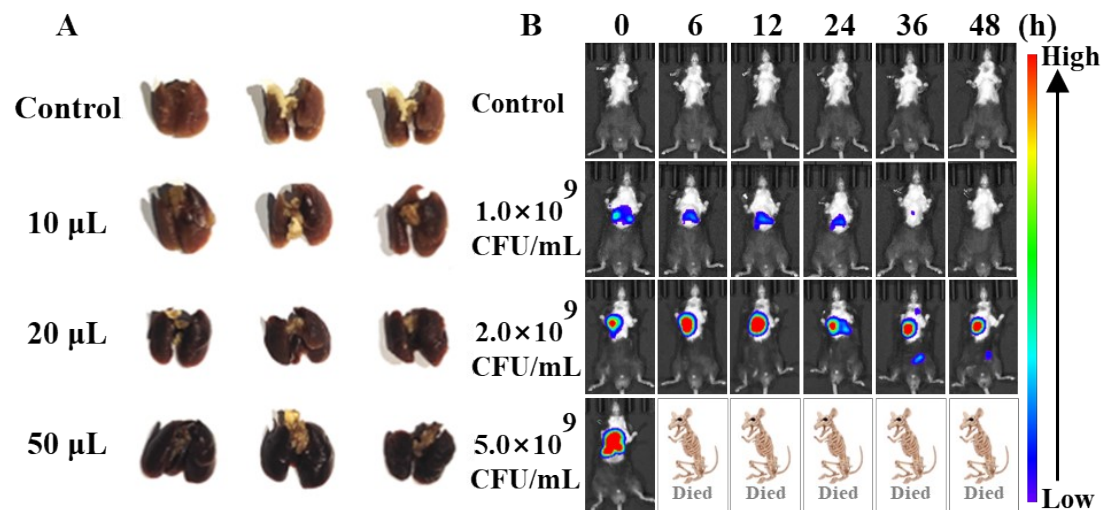

**Figure S8.** Modeling of pneumonia. (A) *In vitro* photograph of isolated lung organs 48 h after injection of different volumes of *E. coli-lux* solution into the right lung parenchyma. (B) Photographs of fluorescence imaging of living mice at the indicated time points after injection of *E. coli-lux* solutions (10 µL/mouse) into the right lung parenchyma. All data are presented as the mean  $\pm$  SD (n = 3).
